# Supplementary material
Source: PubMed Central journal article supplement (PMC7489423)
Supplement: jamacardiol-e203670-s002.pdf [file jamacardiol-e203670-s002.pdf]

## Supplementary Online Content

Lemkes JS, Janssens GN, van der Hoeven NW, et al. Coronary angiography after cardiac arrest without ST segment elevation: one-year outcomes of the COACT randomized clinical trial. *JAMA Cardiol*. Published online September 2, 2020. doi:10.1001/jamacardio.2020.3670

### **eAppendix.** Detailed Trial Characteristics

#### **eFigure 1.** Screening Sample

#### **eTable 1.** Supplementary Procedural and Treatment Characteristics

#### **e Table 2.** Reasons for Crossover

#### **eTable 3.** Urgent CAG in Patients From the Delayed Invasive Strategy

#### **eTable 4.** Reasons for Withdrawal of Life-Sustaining Treatment

#### **e Table 5.** Sensitivity Analysis of Survival at 1 Year

#### **eTable 6.** RAND-36 Questionnaire

#### **eFigure 2.** RAND-36 Questionnaire: Physical and Mental Summary Scores

### **eReferences**

This supplementary material has been provided by the authors to give readers additional information about their work.

## **eAppendix. Detailed Trial Characteristics**

### **The authors responsible for writing the protocol**

Jorrit Lemkes, Heleen Oudemans-van Straaten and Niels van Royen.

### **Steering committee**

Niels van Royen (Chair), Department of Cardiology, Amsterdam University Medical Centre location VUmc, Jorrit Lemkes, Department of Cardiology, Amsterdam University Medical Centre location VUmc, Heleen Oudemans-van Straaten, Department of Intensive care medicine, Amsterdam University Medical Centre location VUmc, Lucia Jewbali, Thoraxcenter, Erasmus Medical center, Michiel Voskuil, Department of Cardiology, University Medical Centre Utrecht. Martijn Meuwissen, Department of Cardiology Amphia Hospital.

### **The trial statistician**

Peter van de Ven

### **The data safety monitoring board**

Freek Verheugt (Chair), OLVG, Eric Boersma (statistician), Thoraxcenter, Erasmus Medical center, Ruud Koster, Amsterdam University Medical Centre location AMC.

## List of participating centers

| <b>COACT Investigators</b>                          | <b>Investigators centers</b>                                     | <b>No. of patients</b> |
|-----------------------------------------------------|------------------------------------------------------------------|------------------------|
| Current: Jorrit Lemkes<br>Previous: Niels van Royen | Amsterdam University Medical Center,<br>location VUmc, Amsterdam | 105                    |
| Current: Lucia Jewbali<br>Previous: Koen Nieman     | Erasmus Medical Center, Rotterdam                                | 93                     |
| Martijn Meuwissen                                   | Amphia Hospital, Breda                                           | 48                     |
| Hans Bosker                                         | Rijnstate Hospital, Arnhem                                       | 39                     |
| Gabe Bleeker                                        | HAGA Hospital, Den Haag                                          | 36                     |
| George Vlachojannis                                 | Maasstad Hospital, Rotterdam                                     | 35                     |
| Pim van der Harst                                   | University Medical Center, Groningen                             | 34                     |
| Michiel Voskuil                                     | University Medical Center, Utrecht                               | 29                     |
| Bert Beishuizen                                     | Medisch Spectrum Twente, Enschede                                | 28                     |
| Cyril Camaro                                        | Radboud University Medical Center, Nijmegen                      | 23                     |
| José Henriques                                      | Amsterdam University Medical Center,<br>location AMC, Amsterdam  | 16                     |
| Maarten Vink                                        | OLVG, Amsterdam                                                  | 14                     |
| Ton Heestermans                                     | Noord West Ziekenhuisgroep, Alkmaar                              | 13                     |
| Thijs Delnoij                                       | Maastricht University Medical Center,<br>Maastricht              | 12                     |
| Gillian Jessurun                                    | Scheper Hospital, Emmen                                          | 10                     |
| Pranobe Oemrawsingh                                 | Haaglanden Medical Center, Den Haag                              | 7                      |
| Marcel Gosselink                                    | Isala Hospital, Zwolle                                           | 5                      |
| Koos Plomp                                          | Ter Gooi Hospital, Blaricum                                      | 3                      |
| Michael Magro                                       | Elisabeth-Tweesteden Hospital, Tilburg                           | 2                      |

### **Inclusion criteria COACT Trial**

- Age > 18 years
- Comatose patients (Glasgow coma score < 8) with return of spontaneous circulation after out-of-hospital cardiac arrest.
- Ventricular tachycardia or ventricular fibrillation as initial arrest rhythm. Including patients treated with an AED.

Abbreviations: AED: automatic external defibrillator.

### **Exclusion criteria COACT Trial**

---

- Signs of STEMI on the ECG at the emergency department (including new LBBB or isolated ST depression in V1-V3 due to a true posterior infarct).
- Hemodynamic instability unresponsive to medical therapy. Defined as a prolonged (>30 min) systolic blood pressure <90 mmHg at the time of screening.
- An obvious or suspected non-coronary cause of the arrest.
- A known severe renal dysfunction (GFR<30 ml/min).
- Obvious or suspected pregnancy.
- Suspected or confirmed acute intracranial bleeding.
- Suspected or confirmed acute stroke.
- Known limitations in therapy or DO Not Resuscitate-order.
- Known pre-arrest Cerebral Performance Category 3 or 4.
- >4 hours (from return of spontaneous circulation to screening).
- Refractory ventricular arrhythmia.
- Known inability to complete 90-day follow-up.

ECG: electrocardiogram, GFR: glomerular filtration rate, LBBB: left bundle branch block, STEMI:

ST-segment elevation myocardial infarction,

## **Informed consent process**

Patients screened for the trial were unconscious and unable to consent at the time of screening. Legal representatives were often not present and if present frequently in no mental state to make a well-considered decision about participating in the study. The study intervention regarded an emergency intervention that had to be applied without delay and fulfilled the ethical requirements of clinical equipoise. Therefore, the patient was informed about the study intervention if and when consciousness recovered. In case the patient did not recover and remained unable to communicate, we informed the legal representative about the study. At that time, consent for use of the study data (deferred consent) was asked. If the patient had died before consent was obtained, the study data was used and no consent was obtained from the legal representatives. The rationale for the latter is that the legal representatives have no say within Dutch legislation about clinical or study data of a deceased. Furthermore, possible refusal may have caused unwanted selection bias(1).

During the first phase of the inclusion period, patients consented to a follow up period up to 90 days. As the follow up period was extended to 5 years during the inclusion period of the study, an additional consent was asked (for the group patients who had consented earlier with the 90 day follow up).

## **Definition of unstable coronary lesion**

All coronary lesions with a stenosis severity of  $\geq 70\%$  and the presence of characteristics of plaque disruption including lesion irregularity, dissection, haziness or thrombus defined by coronary angiography.

## **Discontinuation of treatment**

Patients after OHCA showing no neurological improvement after therapeutic temperature management and discontinuation of sedative medication due to postanoxic coma have a detrimental outcome. If clinical assessment, somatosensory-evoked potentials, and/or electroencephalography, performed 72 hours after the arrest and at least 24 hours after rewarming, predicts a poor outcome (defined as death or a persistent vegetative state), a multidisciplinary team may, in accordance with Dutch and European guidelines, decide to withdraw or limit life-sustaining treatment(2). If there is no consensus or uncertainty about potential recovery, the decision is postponed and the assessment is repeated at a later time.

## **Biomarker measurements**

Venous blood samples for creatine kinase, creatine kinase-MB mass and troponin T or I determination were obtained at admission and at 3, 6, 12, 24, 36, 48 and 72 hours after admission. Creatinine and lactate were obtained at admission, at 24, 48, 72 hours, and at discharge on the ICU.

## **Outcome definitions**

### *Death*

Death of all cause.

### *Myocardial infarction:*

The definition of myocardial infarction in the COACT trial is based on the universal definition of myocardial infarction(3) and is reported since the index hospitalization.

### *Repeat revascularization:*

Any revascularization procedure (PCI or CABG) after the initial revascularization procedure during the index hospitalization.

### **Additional statistical analysis**

Continuous variables are summarized by mean and standard deviation if data were normal and median and interquartile range (IQR) otherwise. Normality was assessed visually by means of QQ-plots. Mean differences with 95% confidence intervals are presented for normally distributed end points and ratio of geometric means with 95% confidence intervals are presented for continuous outcomes that are not normally distributed. Dichotomous outcomes are summarized by frequencies and percentage with odds ratios reported as the effect size together with a 95% confidence interval.

Time to death was visualized by means of Kaplan-Meier curves with the hazard ratio based on a Cox regression model reported as effect size.

A sensitivity analysis was performed to assess the robustness of the conclusions for the end point of survival to missingness due to drop out (lacking of informed consent). Two extreme settings were considered: a setting in which all 16 patients with missing survival data in the immediate group were assumed survivors and all 14 patients with missing survival data in the delayed group were assumed non-survivors and a setting in which all 16 patients with missing survival data in the immediate group were assumed non-survivors and all 14 patients with missing survival data in the delayed group were assumed survivors. Odds ratios with 95% confidence intervals and p-values for the chi-square test were calculated for both these extreme settings.

## eFigure 1. Screening sample

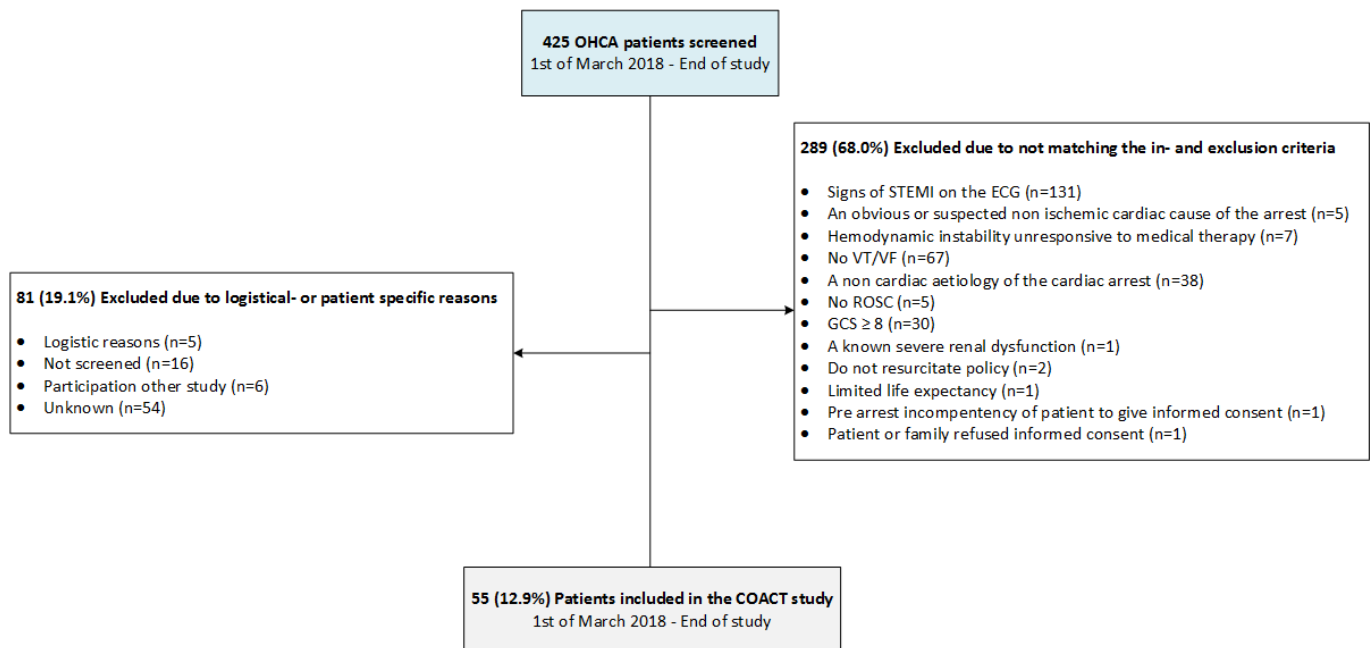

**Figure legend:** The screening sample comprises screened OHCA patients and their exclusion reasons from the 1<sup>st</sup> of March until the end of the study (17<sup>th</sup> of July). During this period, all participating centers were enrolling patients.

Abbreviations: COACT, coronary angiography after cardiac arrest; ECG, electro cardiogram; GCS, Glasgow coma scale; OHCA, out of hospital cardiac arrest; ROSC, return of spontaneous circulation; STEMI, ST-segment elevated myocardial infarction; VF, ventricular fibrillation; VT, ventricular tachycardia.





**eTable 1. Supplementary procedural and Treatment Characteristics**

| <b>Variable</b>                                         | <b>Immediate Angiography group (n = 264)</b> | <b>Delayed Angiography group (n = 258)</b> |
|---------------------------------------------------------|----------------------------------------------|--------------------------------------------|
| CAG access site - no./total no. (%)                     |                                              |                                            |
| Femoral                                                 | 153/256 (59.8)                               | 45/166 (27.1)                              |
| Radial                                                  | 103/256 (40.2)                               | 121/166 (72.9)                             |
| Location of acute unstable lesion - no./total no. (%)   |                                              |                                            |
| LM                                                      | 1/33 (3.0)                                   | 1/27 (3.7)                                 |
| LAD                                                     | 9/33 (27.3)                                  | 10/27 (37.0)                               |
| RCX                                                     | 15/33 (45.5)                                 | 11/27 (40.7)                               |
| RCA                                                     | 8/33 (24.2)                                  | 5/27 (18.5)                                |
| Graft                                                   | 0/33 (0.0)                                   | 0/27 (0.0)                                 |
| Location acute thrombotic occlusion - no./total no. (%) |                                              |                                            |
| LM                                                      | 0/8 (0.0)                                    | 0/13 (0.0)                                 |
| LAD                                                     | 0/8 (0.0)                                    | 4/13 (30.8)                                |
| RCX                                                     | 6/8 (75.0)                                   | 7/13 (53.8)                                |
| RCA                                                     | 2/8 (25.0)                                   | 2/13 (15.4)                                |
| Graft                                                   | 0/8 (0.0)                                    | 0/13 (0.0)                                 |
| Aspiration thrombectomy - no./total no. (%)             | 5/256 (2.0)                                  | 1/167 (0.6)                                |
| Timing of PCI                                           |                                              |                                            |
| PCI performed during first CAG - no. (%)                | 61/86 (70.9)                                 | 49/63 (77.8)                               |
| Staged PCI - no. (%)                                    | 19/86 (22.1)                                 | 14/63 (22.2)                               |
| PCI both first CAG and staged - no. (%)                 | 6/86 (7.0)                                   | 0/63 (0.0)                                 |
| Treated coronary arteries by PCI - no./total no. (%)    |                                              |                                            |
| Left main                                               | 7/86 (8.1)                                   | 3/63 (4.8)                                 |
| LAD                                                     | 39/86 (45.3)                                 | 33/63 (52.4)                               |
| RCX                                                     | 34/86 (39.5)                                 | 28/63 (44.4)                               |
| RCA                                                     | 25/86 (29.1)                                 | 19/63 (30.2)                               |
| Graft                                                   | 4/86 (4.7)                                   | 0/63 (0.0)                                 |
| Median total number of stents (IQR) - no.               | 1 (1-2)                                      | 1 (1-2)                                    |
| Stent type - no./total no. (%)                          |                                              |                                            |
| Bare metal                                              | 1/75 (1.3)                                   | 1/57 (1.7)                                 |
| Drug-eluting                                            | 70/75 (92.1)                                 | 55/57 (93.2)                               |
| Other                                                   | 4/75 (5.3)                                   | 2/57 (3.4)                                 |
| Median total stent length (IQR) - mm                    | 30 (19-61)                                   | 24 (15-48)                                 |
| Median time from randomization to CABG (IQR) - days     | 13.5 (10.5-23.4)                             | 16.1 (14.0-19.3)                           |
| ICD implantation* - no. (%)                             | 107 (40.5)                                   | 102 (39.5)                                 |
| <b>Intensive care support</b>                           |                                              |                                            |
| Noradrenaline administration - no. (%)                  | 231 (87.5)                                   | 225 (87.2)                                 |
| Dobutamine administration - no. (%)                     | 65 (24.6)                                    | 76 (29.5)                                  |
| Dopamine administration - no. (%)                       | 11 (4.2)                                     | 17 (6.6)                                   |
| Phosphodiesterase administration - no. (%)              | 20 (7.6)                                     | 24 (9.3)                                   |
| Targeted temperature management - no. (%)               | 248 (93.9)                                   | 241 (93.4)                                 |
| Median time to targeted temperature (IQR) - hr          | 5.5 (2.9-8.6)                                | 4.7 (2.4-7.2)                              |

|                                                                  |                |                |
|------------------------------------------------------------------|----------------|----------------|
| Targeted temperature management goal - no./total no. (%)         |                |                |
| Hypothermia (30-35.9°C)                                          | 152/246 (61.8) | 147/240 (61.3) |
| Normothermia (36-37°C)                                           | 94/246 (38.2)  | 93/240 (38.8)  |
| Targeted temperature management method - no. (%)                 |                |                |
| Surface cooling device <sup>∞</sup>                              | 194/248 (78.2) | 185/241 (76.8) |
| Intravascular cooling device <sup>§</sup>                        | 54/248 (21.8)  | 56/241 (23.2)  |
| Lowest temperature                                               | 33.7±1.5       | 33.7±1.5       |
| Assist device used - no. (%)                                     | 9 (3.4)        | 6 (2.3)        |
| Median duration of stay at ICU (IQR) - days                      | 4 (2-6)        | 4 (2-6)        |
| <b>Medical treatment during hospitalization</b>                  |                |                |
| Salicylates - no. (%)                                            | 201 (76.1)     | 225 (87.2)     |
| P2Y <sub>12</sub> inhibitor - no. (%)                            | 152 (57.6)     | 184 (71.3)     |
| Ticagrelor - no./total no. (%)                                   | 94/263 (35.7)  | 104/257 (40.5) |
| Prasugrel - no./total no. (%)                                    | 2/263 (0.8)    | 1/257 (0.4)    |
| Clopidogrel - no. (%)                                            | 57/263 (21.7)  | 81/257 (31.5)  |
| Unfractionated heparin/LMWH - no. (%)                            | 238 (90.2)     | 229 (88.8)     |
| Bivalirudin - no. (%)                                            | 2 (0.8)        | 2 (0.8)        |
| Glycoprotein IIb/IIIa inhibitor - no. (%)                        | 17 (6.4)       | 7 (2.7)        |
| Statins - no. (%)                                                | 167 (63.3)     | 178 (69.0)     |
| Betablocker - no./total no. (%)                                  | 180/263 (68.4) | 181/257 (70.4) |
| ACE-inhibitor/angiotensin II receptor blocker -no./total no. (%) | 158/263 (60.1) | 164/257 (63.8) |
| Amiodarone - no./total no. (%)                                   | 73/263 (27.8)  | 81/258 (31.4)  |
| Median duration of hospitalization (IQR) - days                  | 11 (5-20)      | 14 (6-22)      |

Abbreviations: ACE, angiotensin-converting-enzyme; CABG, coronary artery bypass graft; CAG, coronary angiography; ICD, implantable cardioverter defibrillator; ICU, intensive care unit; IQR, interquartile range; LAD, left anterior descending artery; LMWH, low molecular weight heparin; RCA, right coronary artery; RCX, right coronary circumflex; SD, standard deviation.

† 35 of these patients went for urgent intervention due to cardiac deterioration.

‡ Six of these patients went for urgent intervention due to cardiac deterioration.

\* In the immediate angiography group at least three and in the delayed angiography group at least four patients already had an ICD before inclusion.

<sup>∞</sup> Surface cooling devices included water circulating cooling blankets and gel-coated adhesive pads.

<sup>§</sup> Intravascular cooling devices are endovascular cooling catheters.

**e Table 2. Reasons for crossover**

| <b>Study No.</b> | <b>Randomized strategy</b> | <b>Crossover to</b> | <b>Comment</b>                                                        |
|------------------|----------------------------|---------------------|-----------------------------------------------------------------------|
| 110098           | Immediate invasive         | Delayed invasive    | Patient appeared to have hemoperitoneum                               |
| 130021           | Immediate invasive         | Delayed invasive    | After randomization patient appeared to have do-not-resuscitate order |
| 140025           | Immediate invasive         | Delayed invasive    | Patient appeared to have subarachnoidal bleeding                      |
| 150024           | Immediate invasive         | Delayed invasive    | Splenic rupture became apparent                                       |
| 150054           | Immediate invasive         | Delayed invasive    | Congenital heart disease emerged as suspected cause of cardiac arrest |
| 150062           | Immediate invasive         | Delayed invasive    | Aorta dissection emerged as suspected cause of cardiac arrest         |
| 150093           | Immediate invasive         | Delayed invasive    | Patient appeared to have epidural hematoma                            |
| 160010           | Immediate invasive         | Delayed invasive    | Logistical reasons                                                    |
| 160016           | Immediate invasive         | Delayed invasive    | Logistical reasons                                                    |
| 230036           | Immediate invasive         | Delayed invasive    | No significant abnormalities on recent coronary angiography           |
| 250001           | Immediate invasive         | Delayed invasive    | High bleeding risk                                                    |
| 250008           | Immediate invasive         | Delayed invasive    | Logistical reasons                                                    |
| 120005           | Delayed invasive           | Immediate invasive  | Logistical reasons                                                    |
| 150017           | Delayed invasive           | Immediate invasive  | Human error                                                           |
| 160023           | Delayed invasive           | Immediate invasive  | Reason unknown                                                        |

**eTable 3. Urgent CAG in patients from the delayed invasive strategy**

| <b>No. of patients</b> | <b>Comment</b>                                                    |
|------------------------|-------------------------------------------------------------------|
| 8                      | Recurrent ventricular arrhythmia, unresponsive to medical therapy |
| 13                     | STEMI                                                             |
| 1                      | Cardiogenic shock                                                 |
| 13                     | Other reason                                                      |

Abbreviations: STEMI, ST segment elevation myocardial infarction.

**eTable 4. Reasons for withdrawal of life-sustaining treatment**

| <b>Outcome</b>                                                     | <b>Immediate<br/>Angiography<br/>Group (N=76)</b> | <b>Delayed<br/>Angiography<br/>Group (N=69)</b> | <b>P Value</b> |
|--------------------------------------------------------------------|---------------------------------------------------|-------------------------------------------------|----------------|
| Reason withdrawal of life-sustaining treatment – no./total no. (%) |                                                   |                                                 | 0.09           |
| Brain death                                                        | 12 (15.8)                                         | 9 (13.0)                                        |                |
| Neurological reasons*                                              | 44 (57.9)                                         | 40 (58.0)                                       |                |
| Multi organ failure                                                | 12 (15.8)                                         | 14 (20.3)                                       |                |
| Comorbidity                                                        | 0 (0.0)                                           | 4 (5.8)                                         |                |
| Other reasons                                                      | 8 (10.5)                                          | 2 (2.9)                                         |                |

\* Neurologic reasons is severe brain damage with persistent coma.

**e Table 5. Sensitivity analysis of survival at 1 year**

| <b>Survival at 1 year – no./total no. (%)</b>    | <b>Immediate<br/>Invasive<br/>Group<br/>(N=280)</b> | <b>Delayed<br/>Invasive<br/>Group<br/>(N=272)</b> | <b>Odds ratio<br/>(95% CI)</b> | <b>P<br/>Value*</b> |
|--------------------------------------------------|-----------------------------------------------------|---------------------------------------------------|--------------------------------|---------------------|
| Missing immediate ‘yes’,<br>missing delayed ‘no’ | 178 (63.6)                                          | 165 (61.0)                                        | 1.13 (0.79-<br>1.60)           | 0.48                |
| Missing immediate ‘no’,<br>missing delayed ‘yes’ | 162 (57.9)                                          | 179 (65.8)                                        | 0.71 (0.51-<br>1.01)           | 0.055               |

\* The delayed invasive group is used as the reference group for odds ratios and mean differences.

**eTable 6 RAND-36 Questionnaire**

| <b>Patient reported measures</b> | <b>Immediate Angiography group (n = 119)</b> | <b>Delayed Angiography group (n = 116)</b> |
|----------------------------------|----------------------------------------------|--------------------------------------------|
| RAND-36® PCS - Median (IQR)      | 49.2 (42.2-55.3)                             | 50.4 (44.9-55.2)                           |
| RAND-36® MCS - Median (IQR)      | 51.3 (42.4-56.4)                             | 50.0 (42.8-56.2)                           |

RAND-36®, Health insurance study questionnaire. Abbreviations: PCS, Physical component summary score; MCS, Mental component summary score



**eFigure 2.**

**RAND-36 Questionnaire: Physical and mental summary scores**

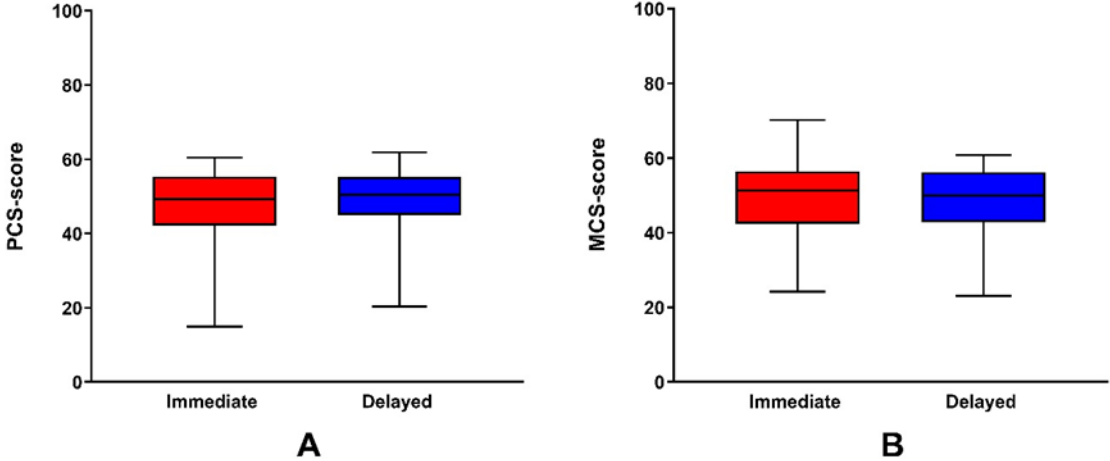

RAND-36®, Health insurance study questionnaire. A: PCS, Physical component summary score B: MCS, Mental component summary score.

## eReferences

1. Kompanje EJO, Jansen TC, Le Noble JLML, de Geus HR, Bakker J. [Deferred consent for inclusion of patients unable to give their consent in studies in the field of emergency medicine]. *Ned Tijdschr Geneeskd*. 2008;152(38):2057-61.
2. Sandroni C, Cariou A, Cavallaro F, Cronberg T, Friberg H, Hoedemaekers C, et al. Prognostication in comatose survivors of cardiac arrest: an advisory statement from the European Resuscitation Council and the European Society of Intensive Care Medicine. *Resuscitation*. 2014;85(12):1779-89.
3. Thygesen K, Alpert JS, Jaffe AS, Simoons ML, Chaitman BR, White HD, et al. Third universal definition of myocardial infarction. *Eur Heart J*. 2012;33(20):2551-67.
